# Supplementary material for: Atrazine exposure causes mitochondrial toxicity in liver and muscle cell lines
Source: PubMed Central journal article supplement — Indian J Pharmacol. 2016 Mar-Apr;48(2):200–7. doi: 10.4103/0253-7613.178842 (PMC4825440; doi:10.4103/0253-7613.178842), 2016
Supplement: IJPharm-48-200_Suppl1.pdf [file IJPharm-48-200_Suppl1.pdf]

### Supplementary Table 1a:

#### List of primers used in real-time polymerase chain reaction analysis in HepG2 cell line

| Category                                   | Genes            | Sense primer          | Antisense primer      | Product size bp      |
|--------------------------------------------|------------------|-----------------------|-----------------------|----------------------|
| NADH dehydrogenase<br>(Complex I)          | ND1              | TCTAGCCACCTCTAGCCTAG  | GTCATGATGGCGGAGTAAT   | 115                  |
|                                            | ND2              | CCTCAATTACCCACATAGGA  | TTGAGTAGTAGGAATGCGGT  | 228                  |
|                                            | ND3              | CCCTCCTAGCCTTACTACTA  | TTGTTTGTAGGGCTCATGGT  | 213                  |
|                                            | ND4              | CTGGGTCAATAGTACTTGCC  | GAATGGCTGTTACTACGAGG  | 228                  |
|                                            | ND4L             | CACACCTCATATCCTCCCTA  | GCACAATATTGGCTAAGAGG  | 108                  |
|                                            | ND5              | TGTGCCTAGACCAAGAAGTT  | GTTGGAATAGGTTGTTAGCG  | 256                  |
|                                            | ND6              | ATCAACGCCCATATCATA    | GTTGAGGCTTGGTGAGTGT   | 197                  |
| Cytochrome b (Complex III)                 | cytB             | TATACCCTAGCCAACCCCTT  | GCTACTTGTCCAATGATGGT  | 296                  |
| Cytochrome c oxidase<br>(Complex IV)       | COXI             | TGATCTGCTGCAGTGCTCTG  | TATTAGGACTTTTCGCTTCG  | 519                  |
|                                            | COX II           | ACTAACATCTCAGACGCTCA  | GATTGTCAACGTCAAGGAGT  | 265                  |
|                                            | COX III          | CAATGATGGCGCGATGTAAC  | GGTGATTGATACTCCTGATG  | 270                  |
| ATP synthase (Complex V)                   | ATP6             | AACAACCGACTAATCACCAC  | GTAATGAGTGAGGCAGGAG   | 164                  |
|                                            | ATP8             | ACTATTCTCATCACCCAAC   | GGCAATGAATGAAGCGAACA  | 138                  |
| Complex I                                  | NDUFA6           | GGTTGTGGAGTGGATGCTTT  | TGGAATTGGTGACAGTGT    | 161                  |
|                                            | NDUFB9           | CAGCATCCACAGCCATACAT  | GCAGCTGCTTAACCTCTCGT  | 199                  |
| Complex II                                 | SDHA             | ACCAACTACAAGGGCAGGT   | CGACCAAAGACAACCAGGTC  | 152                  |
|                                            | SDHC             | GAAGAGATGGAGCGTTCTG   | CCAGACACAGGGACTTCACA  | 220                  |
| Complex III                                | UQCRB            | GCAAGTGGCTGGATGGTATT  | GTGCCCTCTTAATGCGAAAC  | 168                  |
|                                            | UQCRC1           | TGTCTCGTGCAGACTTGACC  | GAAGCGGCATGGAGTAAGAG  | 179                  |
| Complex IV                                 | COX5B            | ACTGGGTTGGAGAGGGAGAT  | AGACGACGCTGGTATTGTCC  | 172                  |
|                                            | COX7B            | AGCCACCAGAAACGTACACC  | TGGGGTAACTCTGCCAACA   | 150                  |
| Complex V                                  | ATP5A1           | CCAGGGCTATGAAGCAGGTA  | TATCCCCTTACACCCGCATA  | 222                  |
|                                            | ATP5O            | CGTTTCTCTCTCCCACTCG   | GTGGCATAGCGACCTTCAAT  | 176                  |
| Mitochondrial biogenesis-<br>related genes | PGC-1            | TCAGTCTCACTGGTGGACA   | TGCTTCGTCGTCAAAAACAG  | 531                  |
|                                            | TFAM             | GGCACAGGAAACCAAGTTAGG | CAGAACACCGTGGCTTCTAC  | 366                  |
|                                            | NRF-1            | CTACTCGTGTGGGACAGCAA  | AATTCCGTCGATGGTGAGAG  | 212                  |
|                                            | UCP2             | GGATGTGGTAAAGGTCCGAT  | AGCTGCTCATAGGTGACGAA  | 471                  |
|                                            | CYCS             | GGATGTGGTAAAGGTCCGAT  | AGCTGCTCATAGGTGACGAA  | 184                  |
|                                            | SOD2             | AATCAGGATCCACTGCAAGG  | CGTGGTTTACTTTTTGCAAGC | 180                  |
|                                            | SIRT1            | ACATTAGTGCCTGCCTGGAT  | TATAATCAGGGGCCTGTTGC  | 231                  |
|                                            | SIRT3            | TGACCCTCTTGAAGTGAATC  | ATAGCCCCACTAAAGGAGAC  | 204                  |
|                                            | PCK2             | GTGCACAAAATGTGACCTG   | ATTATTGGACAGTCTTTGTGG | 155                  |
|                                            | Control 18S rRNA | 18S                   | GAGCGAAAGCATTTGCCAAG  | GGCATCGTTTATGGTCGGAA |

Primers were taken from Koo *et al.* 2012. Koo HJ, Piao Y, Pak YK. Endoplasmic reticulum stress impairs insulin signaling through mitochondrial damage in SH-SY5Y cells. *Neurosignals* 2012;20:265-80. ATP=Adenosine triphosphate, PGC-1=Proliferator-activated receptor gamma coactivator 1, TFAM=Mitochondrial transcription factor A, NRF-1=Nuclear respiratory factor 1, UCP2=Uncoupling protein 2, CYCS=Somatic cytochrome c, SOD=Superoxide dismutase, SIRT=Sirtuin, PCK2=Phosphoenolpyruvate carboxykinase 2

## Supplementary Table 1b:

## List of primers used in real-time polymerase chain reaction analysis in L6 cell line

| Category                                   | Genes             | Sense primer              | Antisense primer         | Product size bp      |     |
|--------------------------------------------|-------------------|---------------------------|--------------------------|----------------------|-----|
| NADH dehydrogenase<br>(Complex I)          | ND1               | CCGTTTTCGATATGACCAACT     | TGTGTAGGGTGGAAATCCTG     | 121                  |     |
|                                            | ND2               | CCTCACCATATCCCAACCA       | GAGGAAAGCGGTAGGGTAAG     | 123                  |     |
|                                            | ND3               | CCCATGAGCGATTCAAACAACC    | TTCATTCGTAGCTTAGGCCAAGAG | 95                   |     |
|                                            | ND4               | CAACGAGGAAAACCTAACCCAG    | TGTGATGAGTTTAGGGTTGA     | 123                  |     |
|                                            | ND4L              | CAGCAGTAGGTTTAGCCTTAC     | TTGAGGTTTTGTACGTAGTCTG   | 70                   |     |
|                                            | ND5               | CCCACCAATTATACACCGAA      | TGGGATTGCTTTTCTAGTCAG    | 103                  |     |
| Cytochrome b (Complex III)                 | ND6               | ACTATTAAGCACCCAATACATCCAC | GTTGGCGTTGAAGCCTTAC      | 75                   |     |
|                                            | cytB              | ACCTCCTAATCTTAACATGAATCGG | AAAAGTAGCTGATGGAGGCTAGT  | 87                   |     |
| Cytochrome c oxidase<br>(Complex IV)       | COXI              | GCCTTCGCATCAAACGAGA       | AGGTTCTTCGAATGTGTGGTAG   | 102                  |     |
|                                            | COX II            | AGCTACAGTGACATCAAACC      | CAATGGGTATGAAGCTGTGA     | 86                   |     |
|                                            | COX III           | GCTCAACTTTCCTAATTGTCTG    | CAAACCTACATCTACGAAGTGTCT | 115                  |     |
| ATP synthase (Complex V)                   | ATP6              | CTTGAATTTGCCGTAGCCTT      | GTTATCATGTAGGTACAGGCTTAC | 72                   |     |
|                                            | ATP8              | TTCTTCCCAAACCTTTCCTG      | GAGGCAAATAGGTTTTCGTTC    | 101                  |     |
| Complex I                                  | NDUFA6            | CGTACCCGACCAGTCTCTTC      | ATATTCTGGGCTTCGTGCCAA    | 123                  |     |
|                                            | NDUFB9            | GCTTGATGAGAGCCCGGTTT      | CTGAGGATGCTGGTTTTGCC     | 110                  |     |
| Complex II                                 | SDHA              | ATGGGCGAACCTACTTCAGC      | AAGGTAAACCAGCCGAGTG      | 84                   |     |
|                                            | SDHC              | GTCTGGAGTGACGGTCTTGG      | GGGATCGGAAGCACATGACA     | 184                  |     |
| Complex III                                | UQCRB             | AGTGGGCGAAGAAGTGATCG      | GCAGCTCCTGTCATCTCCAG     | 276                  |     |
|                                            | UQCRC1            | GAGCAGTCTCGCATCCTAC       | GGGCGCCAATACTCTCTACC     | 172                  |     |
| Complex IV                                 | COX5B             | TCATCTGGTTCTGGCTGCAC      | ATGTTAAACCAGGGGTGGGC     | 112                  |     |
|                                            | COX7B             | CATCCTGTCTCCGCGATGT       | TTTGGGGTGACTCTGCCAAC     | 240                  |     |
| Complex V                                  | ATP5A1            | AAGAAGCTGCAAGGATGCTG      | GAATGGAGGACATCTCGGCA     | 177                  |     |
|                                            | ATP5O             | AGTGACCACAGCGTTTCCTT      | TGGGTGAGTCTTGACCTCCA     | 112                  |     |
| Mitochondrial biogenesis-<br>related genes | PGC-1             | CCAGTCTACGGCTGTTTGGT      | TGGAAGAACAGATGTGCCCC     | 153                  |     |
|                                            | TFAM              | GTGATCTCATCCGTCGCAGT      | CAGATGCACGCACAGTCTTG     | 295                  |     |
|                                            | NRF-1             | GGGAAAGAAAGCTGCAAGCC      | TGGTCCGTAATGCTTGGGTC     | 121                  |     |
|                                            | UCP2              | TCTCCAATGTTGCCCGAAA       | TCGTCTGTCATGAGGTTGGC     | 101                  |     |
|                                            | CycS              | CCATAAATATGAGGGTGTGCGC    | CTGGTGTTTAGCATTGCCTGTC   | 180                  |     |
|                                            | SOD2              | GTGTCTGTGGGAGTCCAAGG      | TGCTCCACACATCAATCCC      | 149                  |     |
|                                            | SIRT1             | CCGGACAGCTTCAATAGTG       | CCTGTGGCAGTAACAGTGAC     | 249                  |     |
|                                            | SIRT3             | TGTACTGCAAGCTTCAGCAGTG    | TATCCCAGGGAGACCTCATGT    | 207                  |     |
|                                            | PCK2              | CAAACCTCAGACAGTTCTCTCCTTC | ATGCCCGCAACAACCTCTAC     | 150                  |     |
|                                            | TSC2 housekeeping | TSC2                      | GACTCCGCCACATTAAGCGT     | AGCTGGGACTTTGGTATGGG | 107 |
|                                            |                   | GADPH                     | GCAAGAGAGAGGCCCTCAG      | TGTGAGGGAGATGCTCAGTG | 78  |

ATP=Adenosine triphosphate, PGC-1=Proliferator-activated receptor gamma coactivator 1, TFAM=Mitochondrial transcription factor A, NRF-1=Nuclear respiratory factor 1, UCP2=Uncoupling protein 2, CYCS=Somatocytocrome c, SOD=Superoxide dismutase, SIRT=Sirtuin, PCK2=Phosphoenolpyruvate carboxykinase 2
